# Supplementary material for: Autophagy-related gene P4HB: a novel diagnosis and prognosis marker for kidney renal clear cell carcinoma
Source: publisher site journal article supplement (doi:10.18632/aging.102715), 2020-01-30
Supplement: Supplementary file [file aging-v12i2-102715-supplementary-material-SD1.pdf]

## SUPPLEMENTARY FIGURES

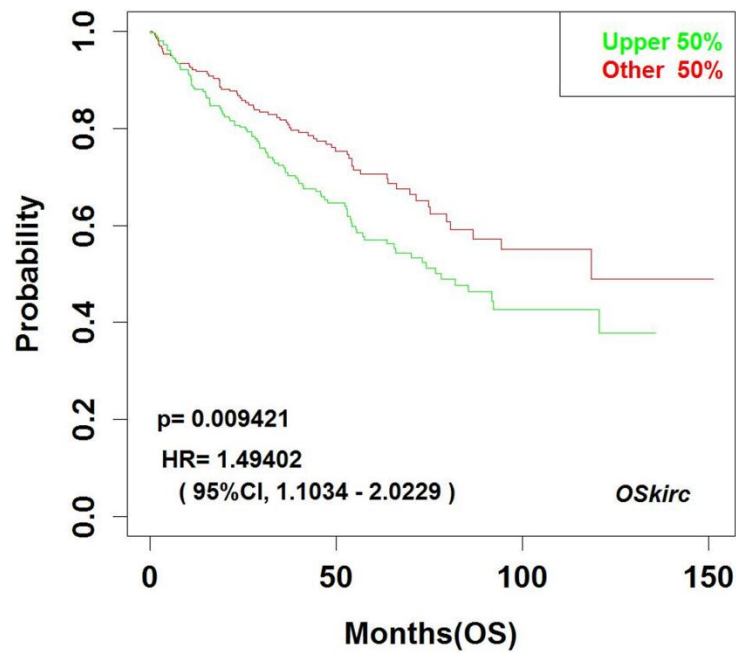

**Supplementary Figure 1. Kaplan-Meier survival analyses on differential *P4HB* expression groups with OS in the included 532 KIRC patients.** The patients were stratified into high and low *P4HB* groups by median (50% upper vs 50% lower). Compared with low mRNA expression of *P4HB*, high *P4HB* expressions were significantly correlated with poor OS ( $p < 0.0001$ );

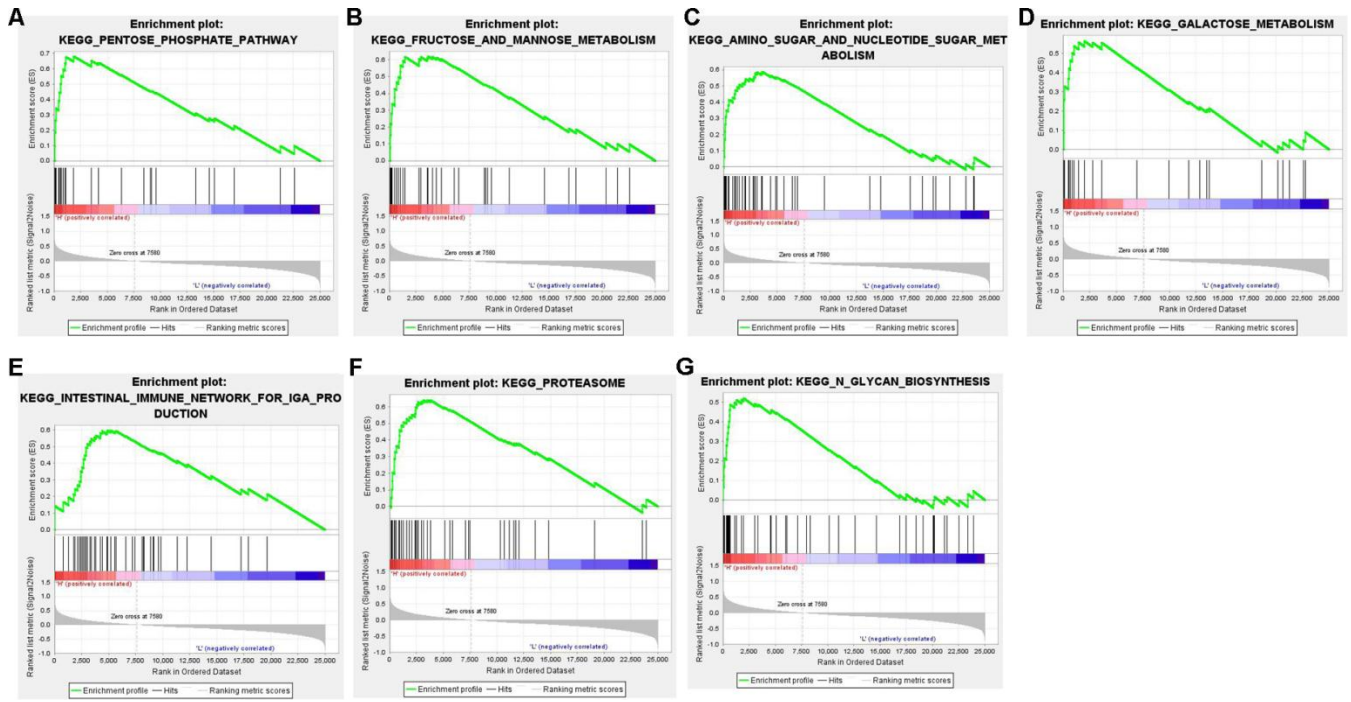

**Supplementary Figure 2. Pathway involved in the pathogenesis of *P4HB* in TCGA-KIRC with GSEA.** Enrichment curves are shown for activated gene sets related to pentose phosphate pathway (A), fructose and mannose metabolism (B), amino sugar and nucleotide sugar metabolism (C), galactose metabolism (D), intestinal immune network for IGA production (E), proteasome (F), N-glycan biosynthesis (G).
